# Supplementary material for: Preparation of hollow microsphere@onion-like solid nanosphere MoS2coated by a carbon shell as a stable anode for optimized lithium storage
Source: Royal Society of Chemistry journal article supplement (doi:10.1039/c5nr05595d), 2015-11-16
Supplement: c5nr05595d1.pdf [file c5nr05595d1.pdf]

## Electronic Supplementary Information

### Preparation of hollow microsphere@onion-like solid nanosphere MoS<sub>2</sub> coated by carbon shell as stable anode for optimized lithium storage

Bangjun Guo, Ke Yu<sup>\*</sup>, Haili Song, Honglin Li, Yinghua Tan, Hao Fu, Chao Li,  
Xiang Lei and Ziqiang Zhu

*Key Laboratory of Polar Materials and Devices (Ministry of Education of China),  
Department of Electronic Engineering, East China Normal University, Shanghai, 200241,  
China.*

<sup>\*</sup> E-mail: [yk5188@263.net](mailto:yk5188@263.net)

### Additional experimental data

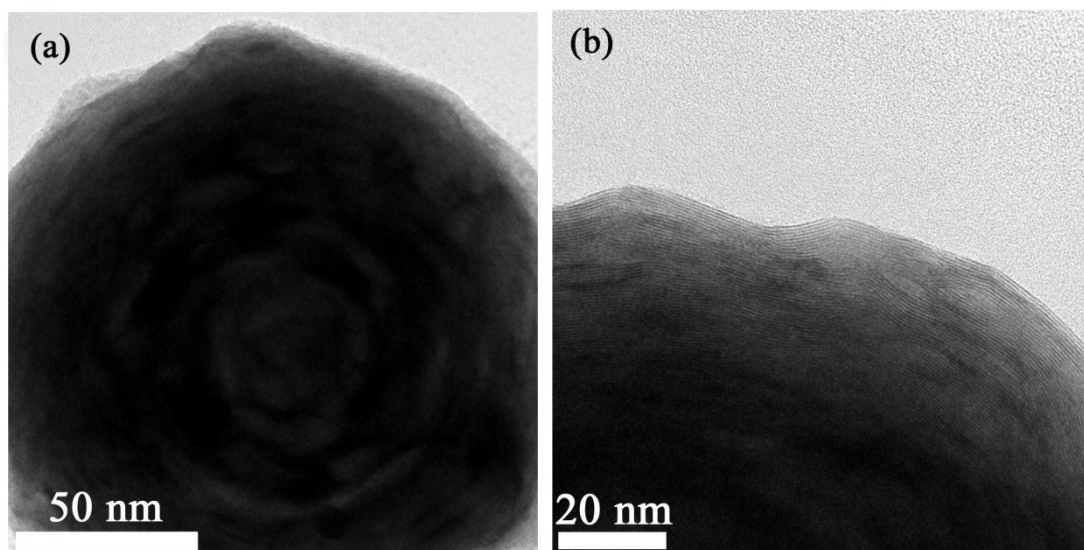

Figure S1. (a) High magnification TEM image of onion-like solid nanosphere. (b) High-resolution TEM image of onion-like solid nanosphere.
